# Supplementary material
Source: PubMed Central journal article supplement (PMC8733851)
Supplement: jamapsychiatry-e213392-s001.pdf [file jamapsychiatry-e213392-s001.pdf]

## Supplementary Online Content

Sánchez XC, Helenius D, Bybjerg-Grauholm J, et al. Comparing copy number variations in a Danish case cohort of individuals with psychiatric disorders. *JAMA Psychiatry*. Published online November 24, 2021.  
doi:10.1001/jamapsychiatry.2021.3392

### **eMethods.** DNA Extraction and CNV Calling

**eTable 1.** Per Locus Details for CNV Calling for iPSYCH Case Cohort.

**eTable 2.** Case Cohort Subgroups: Frequencies of Study Subjects and CNVs Frequencies.

**eTable 3.** Frequencies of CNVs Observed in the Cohort by Gender and Mean Age of Carriers

**eTable 4.** Risk of Neuropsychiatric and Developmental Disorders in CNV Carriers

**eTable 5.** CNV Impact on Male and Female Fertility Rate

**eTable 6.** Somatic Disorders Observed in CNV Carriers

**eFigure 1.** CNV Calling QC

**eFigure 2.** Within CNV-Locus Comparison of Deletion and Duplication

**eFigure 3.** Gender-Stratified Hazard Ratio (HR) for Mental Disorders

**eFigure 4.** Fertility: CNV Effect on Number of Children

**eFigure 5.** Somatic Disorders Enriched in Individuals With CNVs

**eFigure 6.** iPSYCH Study Design Venn Diagram.

### **eReferences**

This supplementary material has been provided by the authors to give readers additional information about their work.

## eMethods. DNA Extraction and CNV Calling

**DNA extraction** For all individuals within the iPSYCH case-cohort, DNA was extracted and whole-genome amplified from available neonatal blood spots retrieved from the Danish Neonatal Screening Biobank (DNSB) [1], and genotyped with the Illumina Infinium PsychArray BeadChip Kit (Illumina, San Diego, CA, USA), as previously described [2]. Samples with blood spots available to analysis included 52,867 cases and 28,650 cohort individuals. Single nucleotide polymorphism (SNP) variant calling and quality control were performed using Illumina's GenTrain software tool. The extraction of B-allele frequency as well as intensity for each probe was performed using Illumina GenomeStudio. Samples with genotyping call rate lower than 97% or genotype-estimated sex discordance with the Danish Civil Registration System were excluded. Individuals with sex chromosome aneuploidy were also excluded. After QC, the sample included 49,250 cases and 25,704 cohort samples ( see eTable 1); the rate of samples lost to genotyping and QC was around 14% and did not differ between cases and controls (Fisher's exact test;  $p=0.59$ ).

**CNV calling** The current study considers deletions and duplications at the following six loci (1q21.1, 15q11.2, 15q13.3, 16p11.2, 17p12 and 17q12; see eTable 1 for hg19 coordinates and number of probes at each locus) as well as at the 22q11.2 locus previously examined in the case-cohort [3]. These 7 loci represent a coherent set for comparative analysis because CNVs at these loci have been previously suggested to be involved in psychiatric disorders [4-9] and they are located within chromosomal regions suitable for reliable CNV calling. Deletions and duplications at these loci were identified using the gold-standard CNV calling algorithm, PennCNV [10], supplemented with iPSYCH CNV (an in-house developed algorithm to optimize CNV identification from WGA-DNA) [11], and subsequent careful, visual inspection of each call including 15 or more probes with at least 10 probes overlapping the respective locus, as previously described in detail [3].

The validation of CNV calls was based on three types of evidence: *First*, for each locus, we divided the total iPSYCH case-cohort into quartiles based on the standard deviation of the log R ratio (LRR-SD) and compared the frequency of deletion and duplication calls across the quartiles. Increased LRR-SD reflects poorer sample quality, and the reduced signal-to-noise ratio increases the risk of the CNV algorithms making spurious calls. Consistently, we observe more calls in the 4th LRR-SD quartile than in the remaining 3 quartiles (eFigure1). To reduce the number of spurious calls, we progressively excluded noisy samples based on LRR-SD until the difference in CNV call frequency across quartiles was equal to or smaller than five percent. As experimental noise varies across genomic regions, the LRR-SD threshold value differs between loci and consequently also the

number of samples evaluated at each locus (eTable 1). *Second*, all CNV calls detected by at least one of the two CNV calling algorithms were plotted for visual inspection of the distribution of the B-Allele Frequency (BAF) and LRR, and independently evaluated by several researchers to obtain consensus calls. *Third*, samples with uncertain consensus calls (n=368) plus a random set of visually validated true and false calls (n=164) were re-genotyped using unamplified, genomic DNA on the Infinium Omni2.5-8 version 1.3 BeadChip (Illumina, San Diego, CA, USA) for clarification (uncertain calls) and verification of the visual evaluations. The fraction of samples labelled as 'uncertain consensus calls' and therefore subjected to re-genotyping was 77% cases and 23% cohort. The higher rate among cases is expected as CNVs confer risk of disease. Importantly the case-cohort ratio of 'uncertain consensus calls' was not significantly different from that of confirmed CNV calls ( $p=0.23$ ); also the confirmation rate (75%) did not differ between cases and cohort ( $p=0.26$ ).

**eTable 1.** Per locus details for CNV calling for iPSYCH case-cohort. Out of the initial sample of 86,189 individuals ( 57,377 cases, 30,000 cohort), a total of 73,923 individuals passed genotyping QC (49,250 cases, 25,704 cohort)

| Locus   | Genomic position             | # probes | Length (MB) | LRR-SD threshold | Inspected deletions | Inspected duplications | Confirmed deletions | Confirmed duplications | Post per locusQC sample size |
|---------|------------------------------|----------|-------------|------------------|---------------------|------------------------|---------------------|------------------------|------------------------------|
| 1q21.1  | chr1:14633058<br>4-147825662 | 288      | 1,5         | 0.36             | 65                  | 99                     | 46                  | 96                     | 68196                        |
| 15q11.2 | chr15:2277099<br>4-23164467  | 136      | 0,39        | 0.34             | 432                 | 387                    | 348                 | 333                    | 64428                        |
| 15q13.3 | chr15:3091617<br>1-32637706  | 300      | 1,7         | 0.34             | 40                  | 72                     | 37                  | 70                     | 69873                        |
| 16p11.2 | chr16:2959548<br>3-30156963  | 241      | 0,56        | 0.33             | 152                 | 156                    | 37                  | 108                    | 54364                        |
| 17p12   | chr17:1400545<br>9-15510011  | 334      | 1,5         | 0.47             | 33                  | 44                     | 31                  | 17                     | 73146                        |
| 17q12   | chr17:3481555<br>1-36249430  | 370      | 1,4         | 0.35             | 37                  | 37                     | 21                  | 36                     | 63520                        |

| <b>eTable 2. Case-cohort subgroups: Frequencies of study subjects and CNVs frequencies</b> |                          |                          |               |                  |               |                  |
|--------------------------------------------------------------------------------------------|--------------------------|--------------------------|---------------|------------------|---------------|------------------|
| Locus                                                                                      | Case-cohort subgroup     | Samples (n) <sup>§</sup> | Deletions (%) | Duplications (%) | Deletions (n) | Duplications (n) |
| AnyCNV <sup>^</sup>                                                                        | Case-Cohort              | 53859                    | 0.75          | 1.03             | 404           | 553              |
|                                                                                            | <b>Cohort</b>            | <b>19014</b>             | <b>0.54</b>   | <b>0.82</b>      | <b>103</b>    | <b>155</b>       |
|                                                                                            | Cases                    | 35597                    | 0.86          | 1.13             | 305           | 403              |
|                                                                                            | Overlap*                 | 752                      | -             | -                | -             | -                |
|                                                                                            | SCZ                      | 1671                     | 0.78          | 1.20             | 13            | 20               |
|                                                                                            | BPD                      | 919                      | 0.54          | 0.54             | 5             | 5                |
|                                                                                            | MDD                      | 14870                    | 0.75          | 0.93             | 112           | 138              |
|                                                                                            | ASD                      | 10956                    | 1.03          | 1.13             | 113           | 124              |
|                                                                                            | ADHD                     | 12633                    | 0.83          | 1.35             | 105           | 170              |
|                                                                                            | ID                       | 3338                     | 1.47          | 1.77             | 49            | 59               |
|                                                                                            | Epilepsy                 | 1842                     | 1.52          | 0.92             | 28            | 17               |
| 1q21.1                                                                                     | Case-Cohort <sup>^</sup> | 68196                    | 0.067         | 0.14             | 46            | 96               |
|                                                                                            | <b>Cohort</b>            | <b>23780</b>             | <b>0.021</b>  | <b>0.097</b>     | <b>5</b>      | <b>23</b>        |
|                                                                                            | Cases                    | 45361                    | 0.090         | 0.17             | 41            | 75               |
|                                                                                            | Overlap*                 | 945                      | -             | -                | -             | -                |
|                                                                                            | SCZ                      | 2344                     | <0.21         | <0.21            | <5            | <5               |
|                                                                                            | BPD                      | 1272                     | <0.39         | <0.39            | <5            | <5               |
|                                                                                            | MDD                      | 18812                    | 0.074         | 0.096            | 14            | 18               |
|                                                                                            | ASD                      | 13196                    | 0.11          | 0.28             | 15            | 37               |
|                                                                                            | ADHD                     | 15256                    | 0.11          | 0.18             | 17            | 28               |
|                                                                                            | ID                       | 3985                     | 0.25          | 0.20             | 10            | 8                |
|                                                                                            | Epilepsy                 | 2261                     | <0.22         | <0.22            | <5            | <5               |
| 15q11.2                                                                                    | Case-Cohort <sup>^</sup> | 64428                    | 0.54          | 0.52             | 348           | 333              |
|                                                                                            | <b>Cohort</b>            | <b>22506</b>             | <b>0.44</b>   | <b>0.49</b>      | <b>99</b>     | <b>111</b>       |
|                                                                                            | Cases                    | 42816                    | 0.59          | 0.53             | 253           | 227              |
|                                                                                            | Overlap*                 | 894                      | -             | -                | -             | -                |
|                                                                                            | SCZ                      | 2190                     | 0.50          | 0.46             | 11            | 10               |
|                                                                                            | BPD                      | 1196                     | <0.42         | 0.42             | <5            | 5                |
|                                                                                            | MDD                      | 17679                    | 0.55          | 0.52             | 97            | 91               |
|                                                                                            | ASD                      | 12520                    | 0.66          | 0.46             | 82            | 58               |
|                                                                                            | ADHD                     | 14429                    | 0.58          | 0.58             | 84            | 84               |
|                                                                                            | ID                       | 3785                     | 0.66          | 0.61             | 25            | 23               |
|                                                                                            | Epilepsy                 | 2144                     | 0.98          | 0.42             | 21            | 9                |
| 15q13.3                                                                                    | Case-Cohort <sup>^</sup> | 69873                    | 0.053         | 0.10             | 37            | 70               |
|                                                                                            | <b>Cohort</b>            | <b>24326</b>             | <b>0.021</b>  | <b>0.062</b>     | <b>5</b>      | <b>15</b>        |
|                                                                                            | Cases                    | 46519                    | 0.069         | 0.12             | 32            | 56               |
|                                                                                            | Overlap*                 | 972                      | -             | -                | -             | -                |

|         |               |              |              |              |           |           |
|---------|---------------|--------------|--------------|--------------|-----------|-----------|
|         | SCZ           | 2439         | <0.21        | <0.21        | <5        | <5        |
|         | BPD           | 1320         | 0            | <0.38        | 0         | <5        |
|         | MDD           | 19342        | 0.078        | 0.12         | 15        | 23        |
|         | ASD           | 13488        | 0.074        | 0.12         | 10        | 16        |
|         | ADHD          | 15615        | 0.070        | 0.13         | 11        | 20        |
|         | ID            | 4072         | 0.27         | 0.20         | 11        | 8         |
|         | Epilepsy      | 2309         | 0.22         | <0.22        | 5         | <5        |
| 16p11.2 | Case-Cohort^  | 54364        | 0.068        | 0.20         | 37        | 108       |
|         | <b>Cohort</b> | <b>19169</b> | <b>0.052</b> | <b>0.11</b>  | <b>10</b> | <b>21</b> |
|         | Cases         | 35955        | 0.078        | 0.25         | 28        | 88        |
|         | Overlap*      | 760          | -            | -            | -         | -         |
|         | SCZ           | 1704         | 0            | 0.35         | 0         | 6         |
|         | BPD           | 925          | 0            | 0            | 0         | 0         |
|         | MDD           | 14071        | <0.036       | 0.18         | <5        | 25        |
|         | ASD           | 11022        | 0.15         | 0.29         | 17        | 32        |
|         | ADHD          | 12650        | 0.063        | 0.36         | 8         | 46        |
|         | ID            | 3316         | <0.15        | 0.57         | <5        | 19        |
|         | Epilepsy      | 1805         | 0.28         | 0.33         | <5        | 6         |
| 17p12   | Case-Cohort^  | 73146        | 0.042        | 0.023        | 31        | 17        |
|         | <b>Cohort</b> | <b>25431</b> | <b>0.051</b> | <b>0.024</b> | <b>13</b> | <b>6</b>  |
|         | Cases         | 48738        | 0.037        | 0.023        | 18        | 11        |
|         | Overlap*      | 1023         | -            | -            | -         | -         |
|         | SCZ           | 2590         | <0.19        | <0.19        | <5        | <5        |
|         | BPD           | 1384         | <0.36        | 0            | <5        | 0         |
|         | MD            | 20186        | 0.054        | 0.025        | 11        | 5         |
|         | ASD           | 14145        | <0.035       | <0.035       | <5        | <5        |
|         | ADHD          | 16427        | <0.030       | <0.030       | <5        | <5        |
|         | ID            | 4257         | <0.12        | <0.12        | <5        | <5        |
|         | Epilepsy      | 2405         | 0            | <0.21        | 0         | <5        |
| 17q12   | Case-Cohort^  | 63520        | 0.033        | 0.057        | 21        | 36        |
|         | <b>Cohort</b> | <b>22185</b> | <b>0.023</b> | <b>0.023</b> | <b>5</b>  | <b>5</b>  |
|         | Cases         | 42214        | 0.038        | 0.073        | 16        | 31        |
|         | Overlap*      | 879          | -            | -            | -         | -         |
|         | SCZ           | 2147         | <0.23        | <0.23        | <5        | <5        |
|         | BPD           | 1160         | 0            | 0            | 0         | 0         |
|         | MDD           | 17177        | <0.029       | 0.047        | <5        | 8         |
|         | ASD           | 12478        | 0.072        | 0.056        | 9         | 7         |
|         | ADHD          | 14403        | 0.049        | 0.12         | 7         | 17        |
|         | ID            | 3780         | 0.16         | <0.13        | 6         | <5        |
|         | Epilepsy      | 2123         | 0            | <0.24        | 0         | <5        |

§ Number of study subjects across CNV loci differs as locus-specific signal-to-noise ratio impacts on sample QC.

^ The number of CNVs observed in the case-cohort based on locus-specific QC criteria (i.e. 520 deletions and 660 duplications) is higher than the number of CNVs observed based on QC criteria shared across loci (reported as 'Any CNV': 404 deletions and 533 duplications). To highlight the impact of QC criteria, the rows showing observations in the Cohort are shown in bold.

\* The Case-Cohort design by necessity results in an overlap between the Cohort and the Case group; i.e.  $\# \text{Case-cohort} = \# \text{Cohort} + \# \text{Cases} - \# \text{Overlap}$  For the entire Cohort and the Cases this overlap is 1,031 individuals, whereas the overlap differs between the analyses of each CNV locus as explained above^.

| <b>eTable 3. Frequencies of CNVs observed in the cohort by gender and mean age of carriers</b> |        |      |                 |
|------------------------------------------------------------------------------------------------|--------|------|-----------------|
| CNV                                                                                            | Female | Male | Mean age (s.d.) |
| 1q21.1 del                                                                                     | <5     | <5   | 17 (5)          |
| 1q21.1 dup                                                                                     | 12     | 11   | 16 (6)          |
| 15q11.2 del                                                                                    | 47     | 52   | 19 (7)          |
| 15q11.2 dup                                                                                    | 63     | 48   | 18 (6)          |
| 15q13.3 del                                                                                    | <5     | <5   | 20 (6)          |
| 15q13.3 dup                                                                                    | 10     | 5    | 20 (7)          |
| 16p11.2 del                                                                                    | <5     | 7    | 14 (4)          |
| 16p11.2 dup                                                                                    | 12     | 9    | 20 (6)          |
| 17p12 del                                                                                      | 7      | 6    | 21 (8)          |
| 17p12 dup                                                                                      | 5      | <5   | 24 (5)          |
| 17q12 del                                                                                      | <5     | <5   | 15 (7)          |
| 17q12 dup                                                                                      | <5     | <5   | 20 (9)          |



**eTable 4.** Risk of neuropsychiatric and developmental disorders in CNV carriers

| Locus   | Diagnosis | Deletions |          |          |         |    |     | Duplications |          |                        |    |
|---------|-----------|-----------|----------|----------|---------|----|-----|--------------|----------|------------------------|----|
|         |           | HR        | lower CI | upper CI | P-value | N  | HR  | lower CI     | upper CI | P-value                | N  |
| 1q21.1  | SCZ       | 3.3       | 0.3      | 32.3     | 0.30    | <5 | 1.5 | 0.3          | 7.6      | 0.61                   | <5 |
|         | BPD       | 9.1       | 0.9      | 89.8     | 0.060   | <5 | 1.7 | 0.2          | 14.2     | 0.61                   | <5 |
|         | MDD       | 5.8       | 1.5      | 21.1     | 0.010   | 14 | 1.7 | 0.8          | 3.7      | 0.20                   | 18 |
|         | ASD       | 5.1       | 1.6      | 15.8     | 0.0054  | 15 | 3.5 | 1.9          | 6.4      | 3.1 x 10 <sup>-5</sup> | 37 |
|         | ADHD      | 5.4       | 1.8      | 16.6     | 0.0032  | 17 | 2.4 | 1.3          | 4.7      | 0.0064                 | 28 |
|         | ID        | -         | -        | -        | -       | 10 | 7.0 | 0.9          | 52.6     | 0.058                  | 8  |
|         | epilepsy  | -         | -        | -        | -       | <5 | -   | -            | -        | -                      | <5 |
| 15q11.2 | SCZ       | 1.0       | 0.5      | 2.0      | 0.89    | 11 | 1.2 | 0.6          | 2.5      | 0.58                   | 10 |
|         | BPD       | 0.7       | 0.3      | 2.0      | 0.53    | <5 | 1.1 | 0.4          | 2.7      | 0.91                   | 5  |
|         | MDD       | 1.2       | 0.9      | 1.8      | 0.25    | 97 | 1.2 | 0.8          | 1.7      | 0.33                   | 91 |
|         | ASD       | 1.4       | 1.0      | 2.0      | 0.029   | 82 | 1.0 | 0.7          | 1.5      | 0.76                   | 58 |
|         | ADHD      | 1.2       | 0.9      | 1.7      | 0.18    | 84 | 1.3 | 1.0          | 1.8      | 0.062                  | 84 |
|         | ID        | 1.3       | 0.2      | 9.4      | 0.79    | 25 | -   | -            | -        | -                      | 23 |
|         | Epilepsy  | 1.4       | 0.4      | 5.7      | 0.61    | 21 | 1.3 | 3.2          | 5.2      | 0.71                   | 9  |
| 15q13.3 | SCZ       | 8.2       | 1.7      | 39.7     | 0.0092  | <5 | 2.8 | 0.7          | 10.2     | 0.13                   | <5 |
|         | BPD       | -         | -        | -        | -       | 0  | 2.7 | 0.5          | 14.0     | 0.23                   | <5 |
|         | MDD       | 3.2       | 0.8      | 13.3     | 0.10    | 15 | 2.5 | 0.9          | 6.5      | 0.061                  | 23 |
|         | ASD       | 3.6       | 1.1      | 12.1     | 0.040   | 10 | 2.5 | 1.1          | 5.7      | 0.029                  | 16 |
|         | ADHD      | 3.4       | 1.1      | 11.0     | 0.041   | 11 | 2.6 | 1.1          | 5.8      | 0.029                  | 20 |
|         | ID        | -         | -        | -        | -       | 11 | -   | -            | -        | -                      | 8  |
|         | Epilepsy  | -         | -        | -        | -       | 5  | -   | -            | -        | -                      | <5 |
| 16p11.2 | SCZ       | -         | -        | -        | -       | 0  | 2.7 | 1.0          | 7.4      | 0.056                  | 6  |
|         | BPD       | -         | -        | -        | -       | 0  | -   | -            | -        | -                      | 0  |
|         | MDD       | 1.7       | 0.4      | 6.7      | 0.46    | <5 | 1.3 | 0.6          | 2.7      | 0.54                   | 25 |
|         | ASD       | 2.6       | 1.2      | 6.0      | 0.021   | 17 | 2.7 | 1.4          | 4.8      | 0.0015                 | 32 |
|         | ADHD      | 1.2       | 0.4      | 3.2      | 0.77    | 8  | 3.2 | 1.8          | 5.6      | 9.3 x 10 <sup>-5</sup> | 46 |
|         | ID        | -         | -        | -        | -       | <5 | -   | -            | -        | -                      | 19 |
|         | Epilepsy  | 10.6      | 1.3      | 85.6     | 0.026   | <5 | 6.6 | 1.7          | 25.6     | 0.0062                 | 6  |
| 17p12   | SCZ       | 0.6       | 0.1      | 4.6      | 0.59    | <5 | 3.3 | 0.8          | 14.3     | 0.11                   | <5 |
|         | BPD       | 0.8       | 0.1      | 6.5      | 0.82    | <5 | -   | -            | -        | -                      | 0  |
|         | MDD       | 0.6       | 0.2      | 1.6      | 0.33    | 11 | 0.5 | 0.1          | 1.6      | 0.22                   | 5  |
|         | ASD       | 0.6       | 0.2      | 1.9      | 0.39    | <5 | 1.2 | 0.3          | 5.1      | 0.80                   | <5 |
|         | ADHD      | 0.4       | 0.1      | 1.3      | 0.11    | <5 | 0.9 | 0.2          | 3.5      | 0.83                   | <5 |

|              |          |     |     |      |        |    |      |     |      |        |    |
|--------------|----------|-----|-----|------|--------|----|------|-----|------|--------|----|
|              | ID       | -   | -   | -    | -      | <5 | -    | -   | -    | -      | <5 |
|              | Epilepsy | -   | -   | -    |        | 0  | 10.2 | 1.5 | 71.4 | 0.018  | <5 |
| <b>17q12</b> | SCZ      | 4.2 | 0.3 | 65   | 0.30   | <5 | 5.0  | 0.9 | 26.6 | 0.060  | <5 |
|              | BPD      | -   | -   | -    | -      | 0  | -    | -   | -    | -      | 0  |
|              | MDD      | 0.3 | 0.0 | 5.0  | 0.43   | <5 | 1.2  | 0.3 | 5.3  | 0.78   | 8  |
|              | ASD      | 6.8 | 2.0 | 22.9 | 0.0020 | 9  | 2.8  | 0.8 | 10.0 | 0.11   | 7  |
|              | ADHD     | 4.4 | 1.2 | 15.9 | 0.023  | 7  | 5.4  | 1.8 | 15.8 | 0.0023 | 17 |
|              | ID       | -   | -   | -    | -      | 6  | -    | -   | -    | -      | <5 |
|              | Epilepsy | -   | -   | -    | -      | 0  | -    | -   | -    | -      | <5 |

| eTable 5. CNV impact on male and female fertility rate. |                    |         |          |          |             |             |             |
|---------------------------------------------------------|--------------------|---------|----------|----------|-------------|-------------|-------------|
| Locus                                                   | CNV                | Females |          |          | Males       |             |             |
|                                                         |                    | RR*     | Lower CI | Upper CI | RR          | Lower CI    | Upper CI    |
| 1q21.1                                                  | Deletion           | 0.99    | 0.56     | 1.75     | -           | -           | -           |
| 1q21.1                                                  | Duplication        | 0.98    | 0.57     | 1.69     | 0.26        | 0.07        | 1.06        |
| 15q11.2                                                 | Deletion           | 0.83    | 0.65     | 1.06     | 1.13        | 0.83        | 1.53        |
| <b>15q11.2</b>                                          | <b>Duplication</b> | 0.95    | 0.75     | 1.20     | <b>0.62</b> | <b>0.38</b> | <b>0.99</b> |
| 15q13.3                                                 | Deletion           | 0.75    | 0.36     | 1.58     | 1.73        | 0.72        | 4.16        |
| 15q13.3                                                 | Duplication        | 1.01    | 0.67     | 1.78     | 1.24        | 0.69        | 2.24        |
| 16p11.2                                                 | Deletion           | 0.15    | 0.02     | 1.04     | -           | -           | -           |
| 16p11.2                                                 | Duplication        | 0.69    | 0.42     | 1.14     | 1.25        | 0.63        | 2.51        |
| 17p12                                                   | Deletion           | 0.97    | 0.56     | 1.66     | 2.33        | 0.75        | 7.23        |
| 17p12                                                   | Duplication        | 1.05    | 0.50     | 2.20     | -           | -           | -           |
| 17q12                                                   | Deletion           | -       | -        | -        | -           | -           | -           |
| 17q12                                                   | Duplication        | 0.75    | 0.28     | 1.98     | 0.78        | 0.29        | 2.07        |

\* Risk ratio; relative change in number of offspring derived from a Poisson regression model with age and mental disorders as covariates. Significant findings are shown in bold.

**eTable 6.** Somatic disorders observed in CNV carriers

| Diagnosis                | Locus   | HR   | DELETIONS |          | P-value | Non-carrier<br>w/o dx | Carrier<br>w/o dx | Non-carrier<br>w. dx | Carrier<br>w. dx |
|--------------------------|---------|------|-----------|----------|---------|-----------------------|-------------------|----------------------|------------------|
|                          |         |      | Lower CI  | Upper CI |         |                       |                   |                      |                  |
| Febrile seizures         | 15q11.2 | 0.48 | 0.21      | 1.07     | 0.070   | 62770                 | 344               | 2881                 | 8                |
| Facial dysmorphism       |         | 0.50 | 0.16      | 1.56     | 0.23    | 64417                 | 349               | 1234                 | <5               |
| Infection (Genital)      |         | 0.83 | 0.26      | 2.58     | 0.74    | 64929                 | 349               | 722                  | <5               |
| Syncope                  |         | 0.88 | 0.50      | 1.5      | 0.64    | 62846                 | 339               | 2805                 | 13               |
| infection (Gastrointest) |         | 0.93 | 0.65      | 1.3      | 0.69    | 58266                 | 315               | 7385                 | 37               |
| Infection (Respiratory)  |         | 1.14 | 0.88      | 1.49     | 0.30    | 52466                 | 271               | 13185                | 81               |
| Infection (Otitis)       |         | 1.09 | 0.75      | 1.586    | 0.65    | 59531                 | 318               | 6120                 | 34               |
| Infection (Skin)         |         | 1.24 | 0.86      | 1.79     | 0.25    | 60850                 | 323               | 4801                 | 29               |
| Asthma                   |         | 1.24 | 0.91      | 1.68     | 0.18    | 58267                 | 307               | 7384                 | 45               |
| Infection (Urological)   |         | 1.50 | 0.88      | 2.55     | 0.13    | 63564                 | 338               | 2087                 | 14               |
| Cardiac malformations    |         | 1.64 | 0.53      | 5.08     | 0.39    | 64764                 | 347               | 887                  | 5                |
| Infection (Sepsis)       |         | 2.21 | 0.71      | 6.93     | 0.17    | 65200                 | 348               | 451                  | <5               |
| Infection (CNS)          |         | 2.31 | 0.96      | 5.58     | 0.062   | 65126                 | 346               | 525                  | 6                |
| Juvenile arthritis       |         | 4.26 | 1.76      | 10.38    | 0.0014  | 65426                 | 347               | 225                  | 5                |
| Thrombocytopenic purp    | 4.73    | 1.16 | 19.29     | 0.03     | 65572   | 350                   | 79                | <5                   |                  |
| Asthma                   | 15q13.3 | 0.77 | 0.25      | 2.39     | 0.65    | 63810                 | 34                | 8029                 | <5               |
| Infection (Skin)         |         | 0.76 | 0.18      | 3.09     | 0.70    | 66537                 | 34                | 5302                 | <5               |
| Syncope                  |         | 1.06 | 0.27      | 4.2      | 0.93    | 68737                 | 35                | 3102                 | <5               |
| infection (Gastrointest) |         | 1.23 | 0.54      | 2.84     | 0.61    | 63757                 | 32                | 8082                 | 5                |
| Infection (Respiratory)  |         | 1.41 | 0.69      | 2.89     | 0.34    | 57364                 | 29                | 14475                | 8                |
| Infection (Otitis)       |         | 1.45 | 0.55      | 3.84     | 0.45    | 65150                 | 32                | 6689                 | 5                |
| Infection (Urological)   |         | 1.71 | 0.45      | 6.45     | 0.43    | 69562                 | 35                | 2277                 | <5               |
| Facial dysmorphism       |         | 2.94 | 0.74      | 11.66    | 0.12    | 70488                 | 35                | 1351                 | <5               |
| Thyroiditis              | 44.7    | 10.8 | 185       | 2.1E-07  | 71756   | 35                    | 83                | <5                   |                  |
| Infection (Skin)         | 16p11.2 | 0.86 | 0.21      | 3.49     | 0.83    | 51802                 | 35                | 3999                 | <5               |
| Syncope                  |         | -    | -         | -        | -       | -                     | -                 | -                    | -                |
| Infection (Respiratory)  |         | 1.54 | 0.76      | 3.14     | 0.23    | 44612                 | 30                | 11189                | 9                |
| Febrile seizures         |         | 2.24 | 0.72      | 6.96     | 0.16    | 53319                 | 34                | 2482                 | 5                |
| Asthma                   |         | 2.38 | 1.19      | 4.74     | 0.014   | 49461                 | 30                | 6340                 | 9                |
| infection (Gastrointest) |         | 2.14 | 0.99      | 4.59     | 0.05    | 49598                 | 31                | 6203                 | 8                |
| Infection (Otitis)       | 17p12   | 0.49 | 0.067     | 3.64     | 0.48    | 68249                 | 29                | 7023                 | <5               |
| infection (Gastrointest) |         | 0.61 | 0.14      | 2.49     | 0.49    | 66821                 | 29                | 8451                 | <5               |
| Asthma                   |         | 1.39 | 0.52      | 3.74     | 0.51    | 66857                 | 27                | 8415                 | <5               |
| Infection (Respiratory)  |         | 1.67 | 0.77      | 3.62     | 0.19    | 60087                 | 23                | 15185                | 8                |

|                           |        |      |       |       |        |       |    |       |    |
|---------------------------|--------|------|-------|-------|--------|-------|----|-------|----|
| Infection (Respiratory)   | 17q12  | -    | -     | -     | -      | -     | -  | -     | -  |
| Infection (Skin)          |        | -    | -     | -     | -      | -     | -  | -     | -  |
| Asthma                    |        | 1.71 | 0.55  | 5.26  | 0.35   | 58000 | 17 | 7360  | <5 |
| Infection (Otitis)        |        | 1.4  | 0.36  | 5.49  | 0.63   | 59216 | 17 | 6144  | <5 |
| Syncope                   |        | -    | -     | -     | -      | -     | -  | -     | -  |
| infection (Gastrointest.) |        | 3.41 | 1.46  | 7.9   | 0.0045 | 58048 | 14 | 7312  | 7  |
| Febrile seizures          |        | 4.21 | 1.42  | 12.5  | 0.0095 | 62478 | 17 | 2882  | <5 |
| Asthma                    | 1q21.1 | 0.43 | 0.10  | 1.75  | 0.24   | 62225 | 43 | 7856  | <5 |
| Febrile seizures          |        | 0.58 | 0.080 | 4.23  | 0.59   | 66987 | 45 | 3094  | <5 |
| Infection (Skin)          |        | 0.65 | 0.16  | 2.65  | 0.55   | 64928 | 43 | 5153  | <5 |
| infection (Gastrointest)  |        | 0.87 | 0.34  | 2.25  | 0.78   | 62182 | 42 | 7899  | 5  |
| Infection (Respiratory)   |        | 0.92 | 0.40  | 2.11  | 0.85   | 55980 | 37 | 14101 | 10 |
| Syncope                   |        | 1.51 | 0.51  | 4.48  | 0.46   | 67063 | 44 | 3018  | <5 |
| Infection (Otitis)        |        | 2.41 | 1.19  | 4.90  | 0.015  | 63588 | 38 | 6493  | 9  |
| Infection (Sepsis)        |        | 5.40 | 0.74  | 39.32 | 0.096  | 69596 | 45 | 485   | <5 |

|                          |         | DUPLICATIOIS |            |            |       |             |         |             |         |
|--------------------------|---------|--------------|------------|------------|-------|-------------|---------|-------------|---------|
|                          |         |              |            |            |       | Non-carrier | Carrier | Non-carrier | Carrier |
| Diagnosis                | Locus   | HR           | Lower C.I. | Upper C.I. | Pval  | w/o dx      | w/o dx  | w. dx       | w. dx   |
| Syncope                  | 15q11.2 | 0.69         | 0.37       | 1.29       | 0.25  | 62846       | 331     | 2805        | 10      |
| Infection (Urological)   |         | 0.73         | 0.35       | 1.52       | 0.40  | 63564       | 333     | 2087        | 8       |
| Facial dysmorphism       |         | 0.88         | 0.36       | 2.12       | 0.77  | 64417       | 334     | 1234        | 7       |
| Infection (CNS)          |         | 0.97         | 0.24       | 3.9        | 0.97  | 65126       | 338     | 525         | <5      |
| Asthma                   |         | 1.03         | 0.73       | 1.44       | 0.87  | 58267       | 302     | 7384        | 39      |
| Infection (Genital)      |         | 1.12         | 0.42       | 2.93       | 0.82  | 64929       | 337     | 722         | <5      |
| Cardiac malformations    |         | 1.14         | 0.286      | 4.6        | 0.84  | 64764       | 338     | 887         | <5      |
| Infection (Otitis)       |         | 1.19         | 0.82       | 1.73       | 0.35  | 59531       | 305     | 6120        | 36      |
| Infection (Respiratory)  |         | 1.24         | 0.95       | 1.61       | 0.11  | 52466       | 256     | 13185       | 85      |
| Infection (Gastrointest) |         | 1.26         | 0.93       | 1.72       | 0.13  | 58266       | 297     | 7385        | 44      |
| Infection (Skin)         |         | 1.38         | 0.96       | 1.98       | 0.080 | 60850       | 308     | 4801        | 33      |
| Febrile seizures         |         | 1.39         | 0.85       | 2.28       | 0.18  | 62770       | 319     | 2881        | 22      |
| Ulcerative colitis       |         | 2.34         | 0.75       | 7.25       | 0.14  | 65382       | 338     | 269         | <5      |
| Infection (Sepsis)       |         | 2.42         | 0.77       | 7.54       | 0.13  | 65200       | 338     | 451         | <5      |
| Infection (Hepatitis)    | 2.91    | 0.73         | 11.59      | 0.13       | 65510 | 338         | 141     | <5          |         |
| Asthma                   | 15q13.3 | 0.57         | 0.21       | 1.51       | 0.26  | 63810       | 66      | 8029        | 6       |
| Infection (Otitis)       |         | 0.95         | 0.40       | 2.3        | 0.92  | 65150       | 66      | 6689        | 6       |
| Infection (Respiratory)  |         | 0.96         | 0.52       | 1.78       | 0.91  | 57364       | 57      | 14475       | 15      |
| Infection (Gastrointest) |         | 1.15         | 0.57       | 2.33       | 0.68  | 63757       | 63      | 8082        | 9       |
| Febrile seizures         |         | 1.26         | 0.40       | 3.98       | 0.69  | 68661       | 66      | 3178        | 6       |
| Infection (Skin)         |         | 1.81         | 0.93       | 3.53       | 0.078 | 66537       | 62      | 5302        | 10      |
| Facial dysmorphism       |         | 2.46         | 0.79       | 7.71       | 0.12  | 70488       | 69      | 1351        | <5      |
| Infection (Skin)         | 16p11.2 | 0.8          | 0.36       | 1.78       | 0.59  | 51802       | 102     | 3999        | 7       |
| Infection (Gastrointest) |         | 0.64         | 0.30       | 1.35       | 0.24  | 49598       | 101     | 6203        | 8       |
| Infection (Respiratory)  |         | 0.85         | 0.49       | 1.47       | 0.56  | 44612       | 86      | 11189       | 23      |
| Asthma                   |         | 0.72         | 0.36       | 1.44       | 0.35  | 49461       | 99      | 6340        | 10      |
| Syncope                  |         | 0.61         | 0.19       | 1.92       | 0.40  | 53474       | 106     | 2327        | <5      |

|                          |        |      |      |      |         |       |     |       |    |
|--------------------------|--------|------|------|------|---------|-------|-----|-------|----|
| Facial dysmorphism       |        | 1.55 | 0.50 | 4.77 | 0.44    | 54753 | 106 | 1048  | <5 |
| Infection (Otitis)       |        | 1.73 | 1.04 | 2.85 | 0.033   | 50542 | 91  | 5259  | 18 |
| Infection (Urological)   |        | 2.10 | 0.95 | 4.67 | 0.067   | 54082 | 102 | 1719  | 7  |
| Infection (Genital)      |        | 2.59 | 0.81 | 8.22 | 0.11    | 55226 | 106 | 575   | <5 |
| Febrile seizures         |        | 2.71 | 1.51 | 4.88 | 0.00089 | 53319 | 97  | 2482  | 12 |
| Infection (CNS)          |        | -    | -    | -    | -       | -     | -   | -     | -  |
| Asthma                   | 17p12  | -    | -    | -    | -       | -     | -   | -     | -  |
| Infection (Otitis)       |        | 0.90 | 0.13 | 6.40 | 0.92    | 68249 | 15  | 7023  | <5 |
| Infection (Respiratory)  |        | 1.84 | 0.71 | 4.74 | 0.21    | 60087 | 11  | 15185 | 6  |
| Infection (Skin)         |        | 0.98 | 0.14 | 6.98 | 0.98    | 69708 | 15  | 5564  | <5 |
| Infection (Urological)   |        | -    | -    | -    | -       | -     | -   | -     | -  |
| Infection (Gastrointest) |        | 4.4  | 1.96 | 9.88 | 0.00032 | 66821 | 11  | 8451  | 6  |
| Syncope                  |        | 4.23 | 1.32 | 13.6 | 0.015   | 72027 | 14  | 3245  | <5 |
|                          |        |      |      |      |         |       |     |       |    |
| Infection (Skin)         | 17q12  | 0.78 | 0.19 | 3.26 | 0.74    | 60609 | 34  | 4751  | <5 |
| Infection (Respiratory)  |        | 1.00 | 0.42 | 2.37 | 0.99    | 52207 | 27  | 13153 | 9  |
| Asthma                   |        | 1.14 | 0.42 | 3.13 | 0.79    | 58000 | 32  | 7360  | <5 |
| Syncope                  |        | 1.23 | 0.31 | 4.89 | 0.76    | 62574 | 34  | 2786  | <5 |
| Infection (Otitis)       |        | 1.52 | 0.56 | 4.15 | 0.41    | 59216 | 30  | 6144  | 6  |
| Infection (Gastrointest) |        | 1.82 | 0.82 | 4.03 | 0.14    | 58048 | 29  | 7312  | 6  |
| Facial dysmorphism       |        | 1.65 | 0.24 | 11.5 | 0.61    | 64128 | 34  | 1232  | <5 |
| Febrile seizures         |        | 3.07 | 1.16 | 8.09 | 0.023   | 62478 | 31  | 2882  | 5  |
| Infection (Urological)   | 1q21.1 | 0.44 | 0.06 | 3.03 | 0.41    | 67861 | 95  | 2220  | <5 |
| Infection (Gastrointest) |        | 0.81 | 0.38 | 1.72 | 0.59    | 62182 | 88  | 7899  | 9  |
| Syncope                  |        | 1.08 | 0.41 | 2.86 | 0.87    | 67063 | 93  | 3018  | <5 |
| Asthma                   |        | 1.08 | 0.57 | 2.04 | 0.80    | 62225 | 85  | 7856  | 12 |
| Infection (Skin)         |        | 1.20 | 0.57 | 2.53 | 0.63    | 64928 | 89  | 5153  | 8  |
| Infection (Respiratory)  |        | 1.43 | 0.89 | 2.29 | 0.13    | 55980 | 71  | 14101 | 26 |
| Infection (Otitis)       |        | 1.48 | 0.82 | 2.67 | 0.19    | 63588 | 84  | 6493  | 13 |
| Febrile seizures         |        | 1.97 | 0.93 | 4.15 | 0.075   | 66987 | 88  | 3094  | 9  |

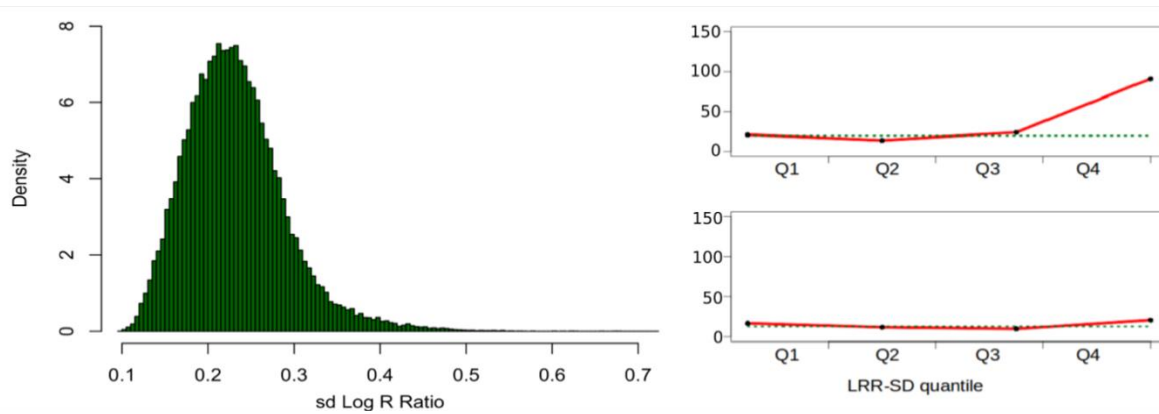

**eFigure 1. CNV calling QC.** **A.** Distribution of the sd Log R Ratio in the iPSYCH cohort. **B.** Quantile based quality control. Example of deletion at 16p11.2 locus. Top image: calls per Log R Ratio sd quantile before filtering noisy samples, bottom image: calls per Log R Ratio sd quantile after removing noisy samples.



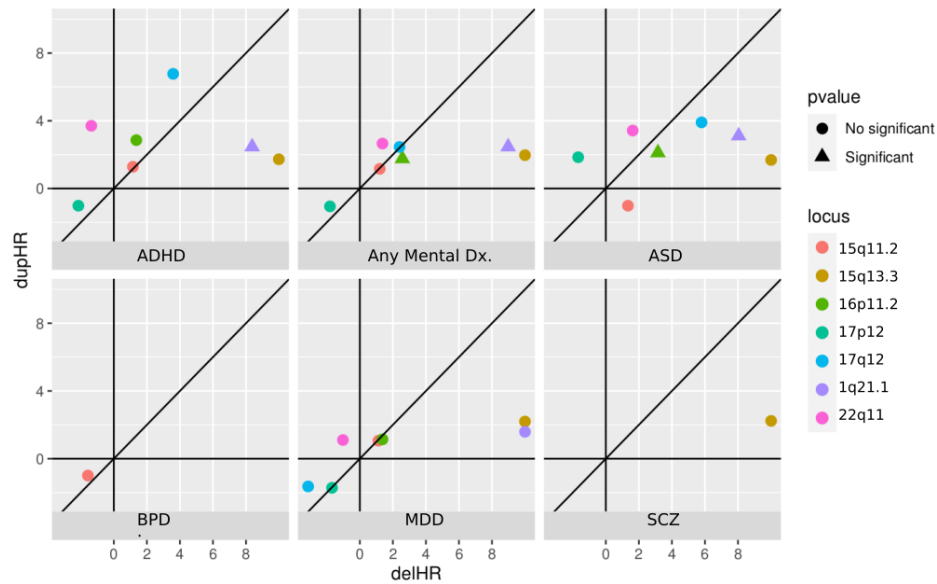

**Figure 2. Within CNV-locus comparison of deletion and duplication.** For each mental disorder, the hazard ratio of the deletion (X-axis; delHR) and the duplication (Y-axis; dupHR) is plotted for each of the seven CNV-loci. The diagonal, corresponding to identical hazard ratio for deletion and duplication, is shown as a black line. CNV-loci with nominally different hazard ratios for deletions and duplication are shown as triangles while non-significant loci are shown as circles.

Females

Males

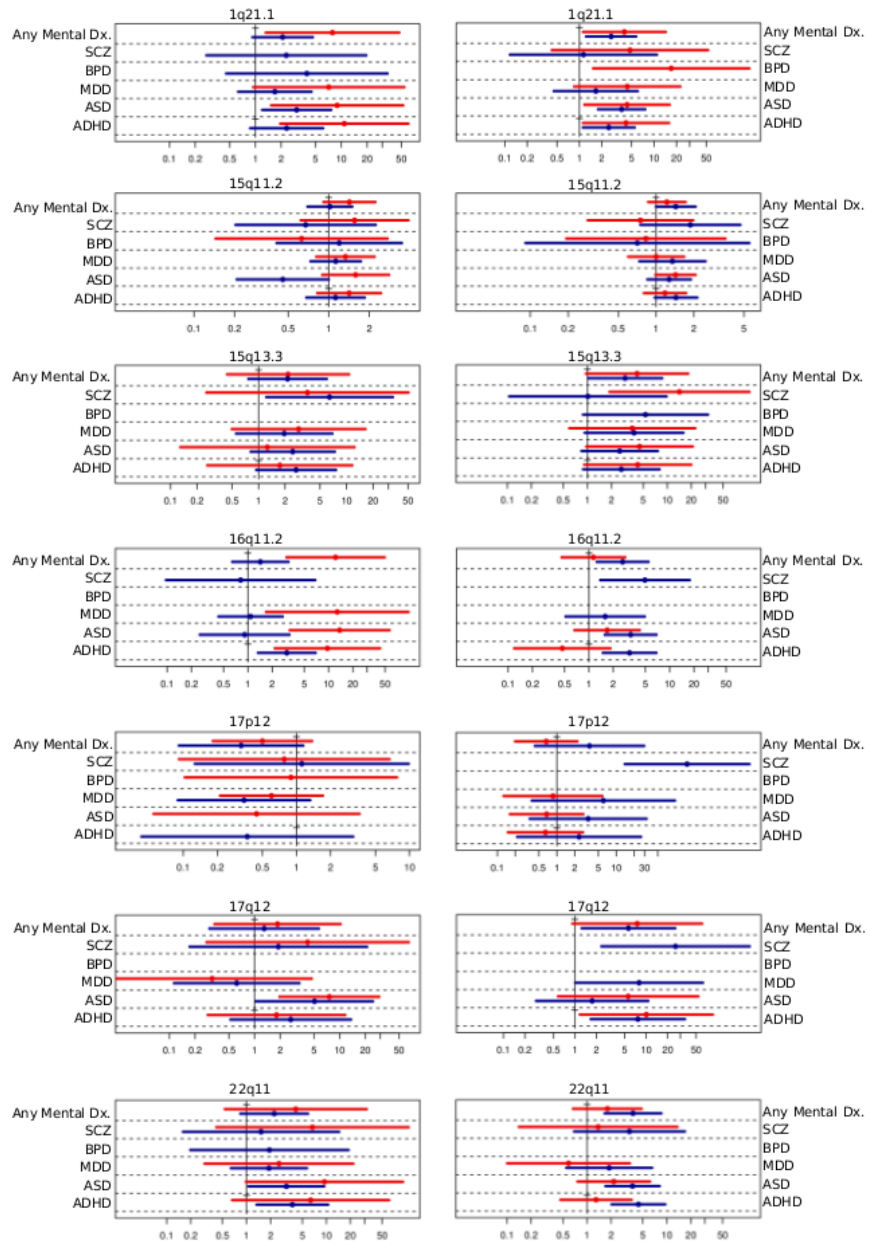

**eFigure 3. Gender-stratified hazard ratio (HR) for mental disorders.** Hazard ratios and CI95% (shown in logarithmic scale) are computed using a Cox-regression model for each locus left and right panels showing results for females and males respectively. Red and blue estimates denote deletions and duplications, respectively. Note, x-axis differs across loci.

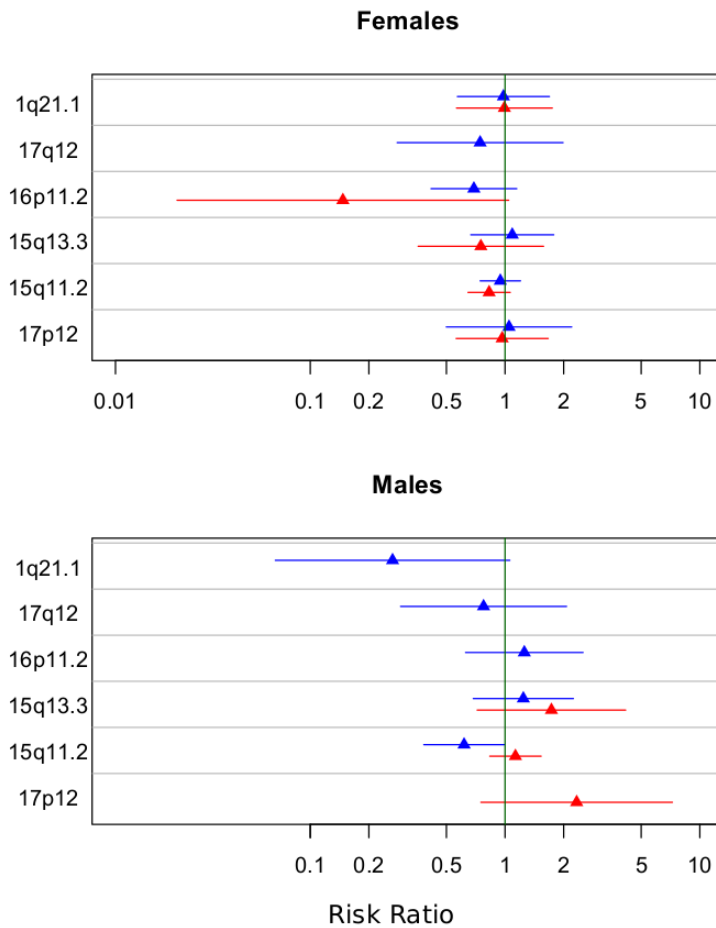

**eFigure 4. Fertility: CNV effect on number of children.** Risk ratio (RR) and 95% confidence interval indicating the relative change in number of offspring carriers of a CNV vs subjects without CNV, in the entire iPSYCH sample. The risk ratio is derived from a Poisson regression model with age and mental disorders as covariates, and done separately for male and female subjects. Red indicates deletions and blue duplications. Comparable

## Deletions

|                              | 1q21.1 | 15q11.2 | 15q13 | 16p11.2 | 17p12 | 17q12 |
|------------------------------|--------|---------|-------|---------|-------|-------|
| facial dysmorphism           | nt     |         |       | nt      | nt    | nt    |
| Cardiac malformations        | nt     |         | nt    | nt      | nt    | nt    |
| febrile seizure              |        |         |       |         | nt    |       |
| Syncope                      |        |         | nt    | nt      | nt    | nt    |
| Asthma                       |        |         |       |         |       |       |
| Thyroiditis                  | nt     | nt      |       | nt      | nt    | nt    |
| Thrombocytopenic purpura     | nt     |         | nt    | nt      | nt    | nt    |
| Juvenile arthritis           | nt     |         | nt    | nt      | nt    | nt    |
| Ulcerative colitis           | nt     | nt      | nt    | nt      | nt    | nt    |
| Infection (Gastrointestinal) |        |         |       |         |       |       |
| Infection (CNS)              | nt     |         | nt    | nt      | nt    | nt    |
| Infection (Sepsis)           |        |         | nt    | nt      | nt    | nt    |
| Infection (Otitis)           |        |         |       | nt      |       |       |
| Infection (Respiratory)      |        |         |       |         |       | nt    |
| Infection (Skin)             |        |         |       |         | nt    | nt    |
| Infection (Urological)       | nt     |         |       | nt      | nt    | nt    |
| Infection (Genital)          | nt     |         | nt    | nt      | nt    | nt    |
| Infection (Hepatitis)        | nt     | nt      | nt    | nt      | nt    | nt    |

## Duplications

|                              | 1q21.1 | 15q11.2 | 15q13 | 16p11.2 | 17p12 | 17q12 |
|------------------------------|--------|---------|-------|---------|-------|-------|
| facial dysmorphism           | nt     |         |       | nt      | nt    | nt    |
| Cardiac malformations        | nt     |         | nt    | nt      | nt    | nt    |
| febrile seizure              |        |         | nt    |         |       |       |
| Syncope                      |        |         |       |         |       |       |
| Asthma                       |        |         |       |         |       |       |
| Thyroiditis                  | nt     | nt      | nt    | nt      | nt    | nt    |
| Thrombocytopenic purpura     | nt     | nt      | nt    | nt      | nt    | nt    |
| Juvenile arthritis           | nt     | nt      | nt    | nt      | nt    | nt    |
| Ulcerative colitis           | nt     | nt      | nt    | nt      | nt    | nt    |
| Infection (Gastrointestinal) |        |         |       |         |       |       |
| Infection (CNS)              | nt     |         | nt    |         | nt    | nt    |
| Infection (Sepsis)           | nt     |         | nt    | nt      | nt    | nt    |
| Infection (Otitis)           |        |         |       |         |       |       |
| Infection (Respiratory)      |        |         |       |         |       |       |
| Infection (Skin)             |        |         |       |         |       |       |
| Infection (Urological)       |        |         | nt    |         |       | nt    |
| Infection (Genital)          | nt     | nt      | nt    | nt      | nt    | nt    |
| Infection (Hepatitis)        | nt     | nt      | nt    | nt      | nt    | nt    |

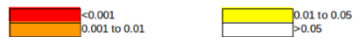

**eFigure 5. Somatic disorders enriched in individuals with CNVs.** Somatic disorders, observed in a least two carriers with a given CNV and enriched in the CNV carriers relative to the background population based on Cox regression model. P-values are uncorrected. nt = not tested.

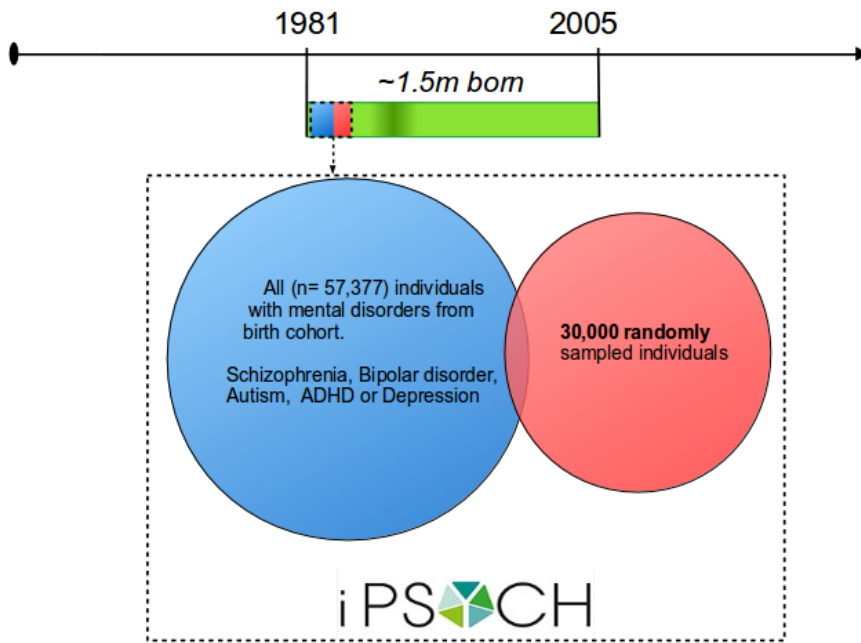

**eFigure 6.** iPSYCH study design Venn diagram.

## eReferences

1. Hollegaard MV, Grauholm J, Børglum A, et al. Genome-wide scans using archived neonatal dried blood spot samples. *BMC Genomics*. 2009;10:297.
2. Hollegaard MV, Grove J, Grauholm J, et al. Robustness of genome-wide scanning using archived dried blood spot samples as a DNA source. *BMC Genet*. 2011;12:58
3. Olsen, L. et al. Prevalence of rearrangements in the 22q11.2 region and population-based risk of neuropsychiatric and developmental disorders in a Danish population: a case-cohort study. *The Lancet Psychiatry* **5**, 573–580 (2018).
4. Kirov, G. et al. Support for the involvement of large copy number variants in the pathogenesis of schizophrenia. *Hum. Mol. Genet.* **18**, 1497–1503 (2009).
5. Moreno-De-Luca, D. et al. Deletion 17q12 is a recurrent copy number variant that confers high risk of autism and schizophrenia. *Am. J. Hum. Genet.* **87**, 618–630 (2010).
6. Szatkiewicz, J. P. et al. Copy number variation in schizophrenia in Sweden. *Mol. Psychiatry* **19**, 762–773 (2014).
7. Bernier, R. et al. Clinical phenotype of the recurrent 1q21.1 copy-number variant. *Genet. Med.* **18**, 341–349 (2016).
8. Weiss, L. A. et al. Association between microdeletion and microduplication at 16p11.2 and autism. *N. Engl. J. Med.* **358**, 667–675 (2008).
9. McCarthy, S. E. et al. Microduplications of 16p11.2 are associated with schizophrenia. *Nat. Genet.* **41**, 1223– 1227 (2009).
10. Wang, K. et al. PennCNV: An integrated hidden Markov model designed for high-resolution copy number variation detection in whole-genome SNP genotyping data. *Genome Res.* **17**, 1665–1674 (2007).
11. Dos Santos MBQ. iPsychCNV Methods and strategies for copy-number variation detection on Illumina SNP arrays. iPsychCNV. <http://biopsych.dk/iPsychCNV/>.
